# Supplementary material
Source: PubMed Central journal article supplement (PMC3947901)

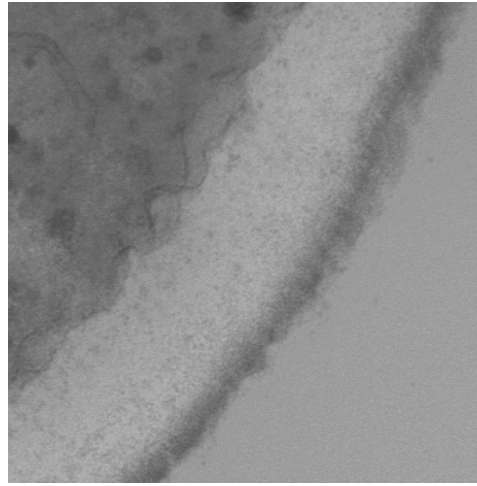

WT  
92nm +/- 22nm

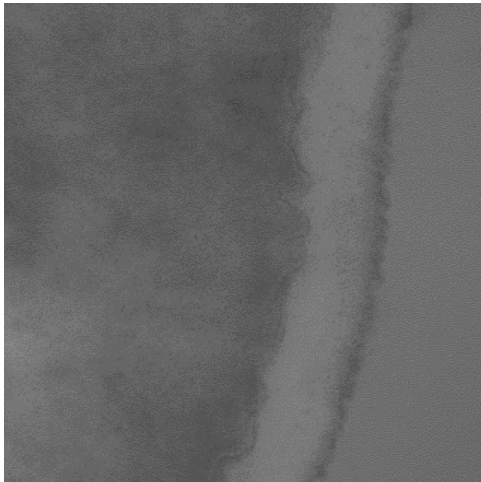

TDH3-ALS1  
69nm +/- 24nm

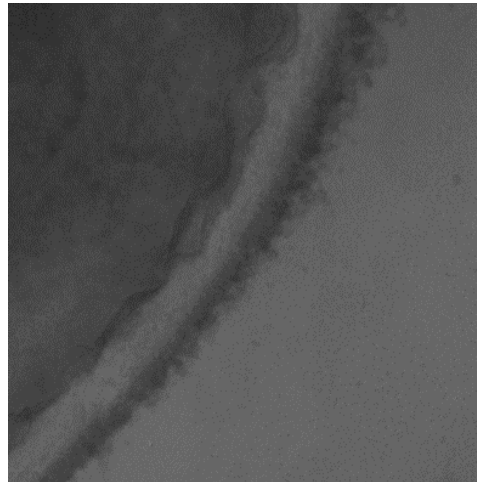

TDH3-ALS2  
39nm +/- 14nm

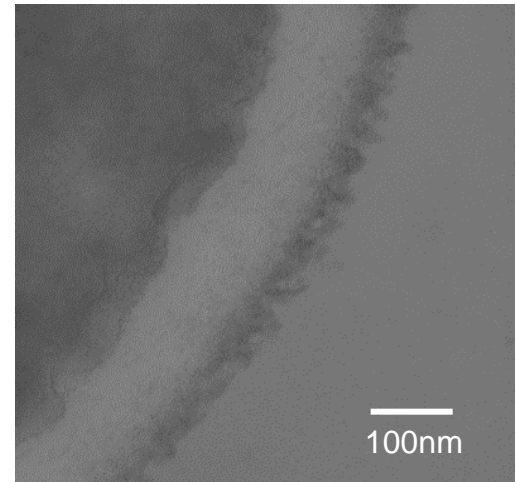

TDH3-ALS4  
75nm +/- 24nm

100nm

# Relative RNA level (mutant/WT or complemented strain)

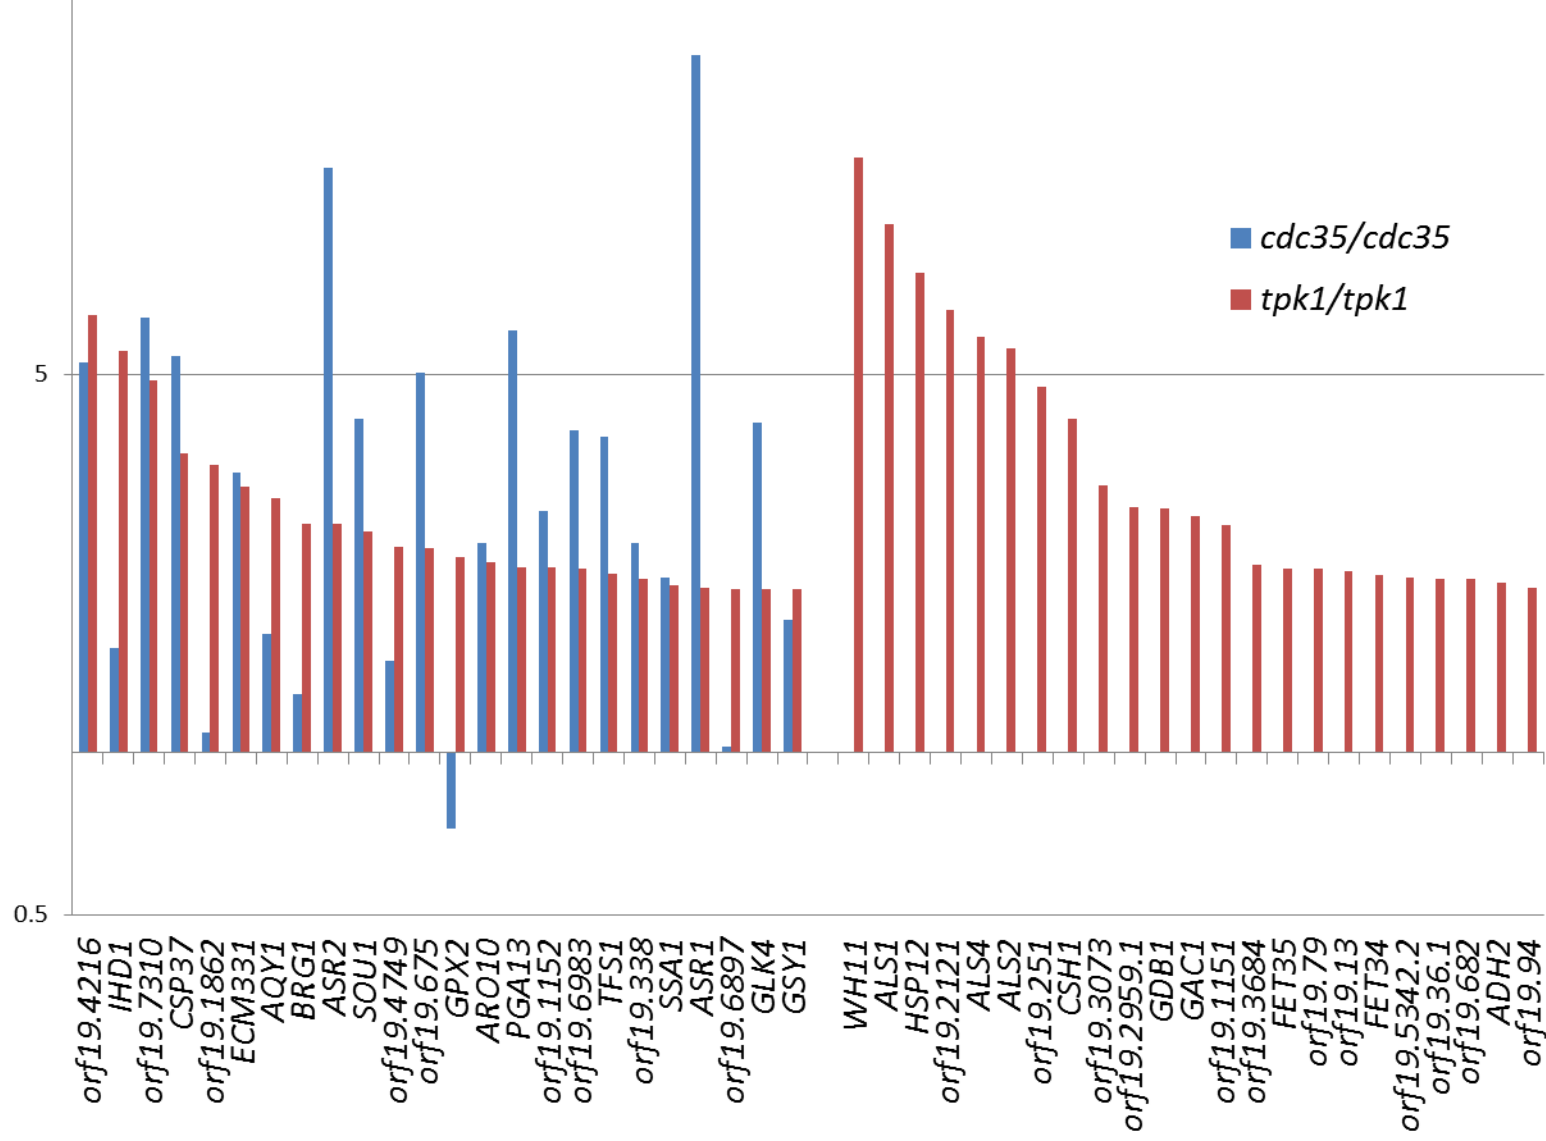

Supplement: NIHMS555050-supplement-Figures_S1_and_S2_in_order.pdf [file NIHMS555050-supplement-Figures_S1_and_S2_in_order.pdf]
