# Supplementary material
Source: PubMed Central journal article supplement (PMC3947901)
Supplement: NIHMS555050-supplement-Table_S2.pdf [file NIHMS555050-supplement-Table_S2.pdf]

**Supplemental Table 2: Insertion Mutant Protein Kinase Library**

| Strain  | Genotype                                                                                                                              | Source/Ref                 |
|---------|---------------------------------------------------------------------------------------------------------------------------------------|----------------------------|
| BWP17   | <u><i>ura3Δ::λimm434 arg4::hisG his1::hisG</i></u><br><i>ura3Δ::λimm434 arg4::hisG his1::hisG</i>                                     | Mitchell Lab               |
| DAY286  | <u><i>ura3Δ::λiimm434 ARG4:URA3::arg4::hisG his1::hisG</i></u><br><i>ura3Δ::λiimm434 arg4::hisG his1::hisG</i>                        | Mitchell Lab               |
| JJH384  | <u><i>ura3Δ::λimm434 arg4::hisG his1::hisG tpk1::Tn7-UAU1</i></u><br><i>ura3Δ::λimm434 arg4::hisG his1::hisG tpk1::Tn7-URA3</i>       | (Blankenship et al., 2010) |
| JJH44   | <u><i>ura3Δ::λimm434 arg4::hisG his1::hisG hst7::Tn7-UAU1</i></u><br><i>ura3Δ::λimm434 arg4::hisG his1::hisG hst7::Tn7-URA3</i>       | (Blankenship et al., 2010) |
| JJH34   | <u><i>ura3Δ::λimm434 arg4::hisG his1::hisG yck2::Tn7-UAU1</i></u><br><i>ura3Δ::λimm434 arg4::hisG his1::hisG yck2::Tn7-URA3</i>       | (Blankenship et al., 2010) |
| SF013   | <u><i>ura3Δ::λimm434 arg4::hisG his1::hisG 19.4347::Tn7-UAU1</i></u><br><i>ura3Δ::λimm434 arg4::hisG his1::hisG 19.4347::Tn7-URA3</i> | (Blankenship et al., 2010) |
| H957-8  | <u><i>ura3Δ::λimm434 arg4::hisG his1::hisG yck3::Tn7-UAU1</i></u><br><i>ura3Δ::λimm434 arg4::hisG his1::hisG yck3::Tn7-URA3</i>       | (Blankenship et al., 2010) |
| VIC1175 | <u><i>ura3Δ::λimm434 arg4::hisG his1::hisG mkc1::Tn7-UAU1</i></u><br><i>ura3Δ::λimm434 arg4::hisG his1::hisG ymkc1::Tn7-URA3</i>      | (Blankenship et al., 2010) |
| JJH91   | <u><i>ura3Δ::λimm434 arg4::hisG his1::hisG 19.35::Tn7-UAU1</i></u><br><i>ura3Δ::λimm434 arg4::hisG his1::hisG 19.35::Tn7-URA3</i>     | (Blankenship et al., 2010) |
| JJH65   | <u><i>ura3Δ::λimm434 arg4::hisG his1::hisG 19.794::Tn7-UAU1</i></u><br><i>ura3Δ::λimm434 arg4::hisG his1::hisG 19.794::Tn7-URA3</i>   | (Blankenship et al., 2010) |
| JJH33   | <u><i>ura3Δ::λimm434 arg4::hisG his1::hisG chk1::Tn7-UAU1</i></u><br><i>ura3Δ::λimm434 arg4::hisG his1::hisG chk1::Tn7-URA3</i>       | (Blankenship et al., 2010) |
| JJH37   | <u><i>ura3Δ::λimm434 arg4::hisG his1::hisG nik1::Tn7-UAU1</i></u><br><i>ura3Δ::λimm434 arg4::hisG his1::hisG nik1::Tn7-URA3</i>       | (Blankenship et al., 2010) |
| SF043   | <u><i>ura3Δ::λimm434 arg4::hisG his1::hisG 19.3049::Tn7-UAU1</i></u><br><i>ura3Δ::λimm434 arg4::hisG his1::hisG 19.3049::Tn7-URA3</i> | (Blankenship et al., 2010) |
| JJH77   | <u><i>ura3Δ::λimm434 arg4::hisG his1::hisG sln1::Tn7-UAU1</i></u><br><i>ura3Δ::λimm434 arg4::hisG his1::hisG sln1::Tn7-URA3</i>       | (Blankenship et al., 2010) |
| SF015   | <u><i>ura3Δ::λimm434 arg4::hisG his1::hisG pkh1::Tn7-UAU1</i></u><br><i>ura3Δ::λimm434 arg4::hisG his1::hisG pkh1::Tn7-URA3</i>       | (Blankenship et al., 2010) |
| SF006   | <u><i>ura3Δ::λimm434 arg4::hisG his1::hisG gcn2::Tn7-UAU1</i></u><br><i>ura3Δ::λimm434 arg4::hisG his1::hisG gcn2::Tn7-URA3</i>       | (Blankenship et al., 2010) |
| SF026   | <u><i>ura3Δ::λimm434 arg4::hisG his1::hisG tpk2::Tn7-UAU1</i></u><br><i>ura3Δ::λimm434 arg4::hisG his1::hisG tpk2::Tn7-URA3</i>       | (Blankenship et al., 2010) |
| SF004   | <u><i>ura3Δ::λimm434 arg4::hisG his1::hisG bck1::Tn7-UAU1</i></u><br><i>ura3Δ::λimm434 arg4::hisG his1::hisG bck1::Tn7-URA3</i>       | (Blankenship et al., 2010) |
| JRB86-1 | <u><i>ura3Δ::λimm434 arg4::hisG his1::hisG 19.7164::Tn7-UAU1</i></u><br><i>ura3Δ::λimm434 arg4::hisG his1::hisG 19.7164::Tn7-URA3</i> | (Blankenship et al., 2010) |
| VIC108  | <u><i>ura3Δ::λimm434 arg4::hisG his1::hisG cka2::ARG4</i></u>                                                                         | (Bruno & Mitchell, 2005)   |

|         |                                                                                                                                |                                                     |
|---------|--------------------------------------------------------------------------------------------------------------------------------|-----------------------------------------------------|
|         | <i>ura3Δ::λimm434 arg4::hisG his1::hisG cka2::URA3</i>                                                                         | (Blankenship et al., 2010)                          |
| SF025   | <i>ura3Δ::λimm434 arg4::hisG his1::hisG 19.5253::Tn7-UAU1</i><br><i>ura3Δ::λimm434 arg4::hisG his1::hisG 19.5253::Tn7-URA3</i> | (Blankenship et al., 2010)                          |
| SA0148  | <i>ura3Δ::λimm434 arg4::hisG his1::hisG cek2::ARG4</i><br><i>ura3Δ::λimm434 arg4::hisG his1::hisG cek2::URA3</i>               | (Blankenship et al., 2010)                          |
| JJH58   | <i>ura3Δ::λimm434 arg4::hisG his1::hisG cst20::Tn7-UAU1</i><br><i>ura3Δ::λimm434 arg4::hisG his1::hisG cst20::Tn7-URA3</i>     | (Blankenship et al., 2010)                          |
| O879-4  | <i>ura3Δ::λimm434 arg4::hisG his1::hisG vps34::Tn7-UAU1</i><br><i>ura3Δ::λimm434 arg4::hisG his1::hisG vps34::Tn7-URA3</i>     | (Blankenship et al., 2010)                          |
| JMR114  | <i>ura3Δ::λimm434 arg4::hisG his1::hisG hog1::ARG4</i><br><i>ura3Δ::λimm434 arg4::hisG his1::hisG hog1::URA3</i>               | (Rauceo et al., 2008)<br>(Blankenship et al., 2010) |
| JJH39   | <i>ura3Δ::λimm434 arg4::hisG his1::hisG 19.4252::Tn7-UAU1</i><br><i>ura3Δ::λimm434 arg4::hisG his1::hisG 19.4252::Tn7-URA3</i> | (Blankenship et al., 2010)                          |
| JJH245  | <i>ura3Δ::λimm434 arg4::hisG his1::hisG 19.4269::Tn7-UAU1</i><br><i>ura3Δ::λimm434 arg4::hisG his1::hisG 19.4269::Tn7-URA3</i> | (Blankenship et al., 2010)                          |
| SF035A  | <i>ura3Δ::λimm434 arg4::hisG his1::hisG 19.4518::Tn7-UAU1</i><br><i>ura3Δ::λimm434 arg4::hisG his1::hisG 19.4518::Tn7-URA3</i> | (Blankenship et al., 2010)                          |
| SF024A  | <i>ura3Δ::λimm434 arg4::hisG his1::hisG rim15::Tn7-UAU1</i><br><i>ura3Δ::λimm434 arg4::hisG his1::hisG rim15::Tn7-URA3</i>     | (Blankenship et al., 2010)                          |
| SF019   | <i>ura3Δ::λimm434 arg4::hisG his1::hisG kin2::Tn7-UAU1</i><br><i>ura3Δ::λimm434 arg4::hisG his1::hisG kin2::Tn7-URA3</i>       | (Blankenship et al., 2010)                          |
| VIC1156 | <i>ura3Δ::λimm434 arg4::hisG his1::hisG mkk2::Tn7-UAU1</i><br><i>ura3Δ::λimm434 arg4::hisG his1::hisG mkk2::Tn7-URA3</i>       | (Blankenship et al., 2010)                          |
| JJH48   | <i>ura3Δ::λimm434 arg4::hisG his1::hisG 19.2605::Tn7-UAU1</i><br><i>ura3Δ::λimm434 arg4::hisG his1::hisG 19.2605::Tn7-URA3</i> | (Blankenship et al., 2010)                          |
| SF039   | <i>ura3Δ::λimm434 arg4::hisG his1::hisG ckb1::Tn7-UAU1</i><br><i>ura3Δ::λimm434 arg4::hisG his1::hisG ckb1::Tn7-URA3</i>       | (Blankenship et al., 2010)                          |
| JRB102  | <i>ura3Δ::λimm434 arg4::hisG his1::hisG cmk1::Tn7-UAU1</i><br><i>ura3Δ::λimm434 arg4::hisG his1::hisG cmk1::Tn7-URA3</i>       | (Blankenship et al., 2010)                          |
| SF051   | <i>ura3Δ::λimm434 arg4::hisG his1::hisG dun1::Tn7-UAU1</i><br><i>ura3Δ::λimm434 arg4::hisG his1::hisG dun1::Tn7-URA3</i>       | (Blankenship et al., 2010)                          |
| JJH115  | <i>ura3Δ::λimm434 arg4::hisG his1::hisG cla4::Tn7-UAU1</i><br><i>ura3Δ::λimm434 arg4::hisG his1::hisG cla4::Tn7-URA3</i>       | (Blankenship et al., 2010)                          |
| SF040   | <i>ura3Δ::λimm434 arg4::hisG his1::hisG sln1::Tn7-UAU1</i><br><i>ura3Δ::λimm434 arg4::hisG his1::hisG sln1::Tn7-URA3</i>       | (Blankenship et al., 2010)                          |
| SF045   | <i>ura3Δ::λimm434 arg4::hisG his1::hisG 19.846::Tn7-UAU1</i><br><i>ura3Δ::λimm434 arg4::hisG his1::hisG 19.846::Tn7-URA3</i>   | (Blankenship et al., 2010)                          |
| JJH70   | <i>ura3Δ::λimm434 arg4::hisG his1::hisG hrk1::Tn7-UAU1</i><br><i>ura3Δ::λimm434 arg4::hisG his1::hisG hrk1::Tn7-URA3</i>       | (Blankenship et al., 2010)                          |
| SF005   | <i>ura3Δ::λimm434 arg4::hisG his1::hisG bub1::Tn7-UAU1</i><br><i>ura3Δ::λimm434 arg4::hisG his1::hisG bub1::Tn7-URA3</i>       | (Blankenship et al., 2010)                          |

|        |                                                                                                                                |                            |
|--------|--------------------------------------------------------------------------------------------------------------------------------|----------------------------|
| SF033  | <u>ura3Δ::λimm434 arg4::hisG his1::hisG hsl1::Tn7-UAU1</u><br><u>ura3Δ::λimm434 arg4::hisG his1::hisG hsl1::Tn7-URA3</u>       | (Blankenship et al., 2010) |
| SF001  | <u>ura3Δ::λimm434 arg4::hisG his1::hisG ksp1::Tn7-UAU1</u><br><u>ura3Δ::λimm434 arg4::hisG his1::hisG ksp1::Tn7-URA3</u>       | (Blankenship et al., 2010) |
| SF054  | <u>ura3Δ::λimm434 arg4::hisG his1::hisG iks1::Tn7-UAU1</u><br><u>ura3Δ::λimm434 arg4::hisG his1::hisG iks1::Tn7-URA3</u>       | (Blankenship et al., 2010) |
| SF002  | <u>ura3Δ::λimm434 arg4::hisG his1::hisG cdc15::Tn7-UAU1</u><br><u>ura3Δ::λimm434 arg4::hisG his1::hisG cdc15::Tn7-URA3</u>     | (Blankenship et al., 2010) |
| JRB100 | <u>ura3Δ::λimm434 arg4::hisG his1::hisG kin3::Tn7-UAU1</u><br><u>ura3Δ::λimm434 arg4::hisG his1::hisG kin3::Tn7-URA3</u>       | (Blankenship et al., 2010) |
| SF037  | <u>ura3Δ::λimm434 arg4::hisG his1::hisG rck2::Tn7-UAU1</u><br><u>ura3Δ::λimm434 arg4::hisG his1::hisG rck2::Tn7-URA3</u>       | (Blankenship et al., 2010) |
| SF029  | <u>ura3Δ::λimm434 arg4::hisG his1::hisG cka2::Tn7-UAU1</u><br><u>ura3Δ::λimm434 arg4::hisG his1::hisG cka2::Tn7-URA3</u>       | (Blankenship et al., 2010) |
| JJH78  | <u>ura3Δ::λimm434 arg4::hisG his1::hisG 19.1196::Tn7-UAU1</u><br><u>ura3Δ::λimm434 arg4::hisG his1::hisG 19.1196::Tn7-URA3</u> | (Blankenship et al., 2010) |
| SF015  | <u>ura3Δ::λimm434 arg4::hisG his1::hisG 19.5224::Tn7-UAU1</u><br><u>ura3Δ::λimm434 arg4::hisG his1::hisG 19.5224::Tn7-URA3</u> | (Blankenship et al., 2010) |
| SF017  | <u>ura3Δ::λimm434 arg4::hisG his1::hisG prr2::Tn7-UAU1</u><br><u>ura3Δ::λimm434 arg4::hisG his1::hisG prr2::Tn7-URA3</u>       | (Blankenship et al., 2010) |
| SF011  | <u>ura3Δ::λimm434 arg4::hisG his1::hisG ak11::Tn7-UAU1</u><br><u>ura3Δ::λimm434 arg4::hisG his1::hisG ak11::Tn7-URA3</u>       | (Blankenship et al., 2010) |
| SF042  | <u>ura3Δ::λimm434 arg4::hisG his1::hisG 19.3841::Tn7-UAU1</u><br><u>ura3Δ::λimm434 arg4::hisG his1::hisG 19.3841::Tn7-URA3</u> | (Blankenship et al., 2010) |
| SF028  | <u>ura3Δ::λimm434 arg4::hisG his1::hisG fun31::Tn7-UAU1</u><br><u>ura3Δ::λimm434 arg4::hisG his1::hisG fun31::Tn7-URA3</u>     | (Blankenship et al., 2010) |
| SF009  | <u>ura3Δ::λimm434 arg4::hisG his1::hisG 19.3854::Tn7-UAU1</u><br><u>ura3Δ::λimm434 arg4::hisG his1::hisG 19.3854::Tn7-URA3</u> | (Blankenship et al., 2010) |
| JJH243 | <u>ura3Δ::λimm434 arg4::hisG his1::hisG 19.6369::Tn7-UAU1</u><br><u>ura3Δ::λimm434 arg4::hisG his1::hisG 19.6369::Tn7-URA3</u> | (Blankenship et al., 2010) |
| SF034  | <u>ura3Δ::λimm434 arg4::hisG his1::hisG vps15::Tn7-UAU1</u><br><u>ura3Δ::λimm434 arg4::hisG his1::hisG vps15::Tn7-URA3</u>     | (Blankenship et al., 2010) |
| SF041  | <u>ura3Δ::λimm434 arg4::hisG his1::hisG ste11::Tn7-UAU1</u><br><u>ura3Δ::λimm434 arg4::hisG his1::hisG ste11::Tn7-URA3</u>     | (Blankenship et al., 2010) |
| NJ77-4 | <u>ura3Δ::λimm434 arg4::hisG his1::hisG ptk2::Tn7-UAU1</u><br><u>ura3Δ::λimm434 arg4::hisG his1::hisG ptk2::Tn7-URA3</u>       | (Blankenship et al., 2010) |
| JJH175 | <u>ura3Δ::λimm434 arg4::hisG his1::hisG 19.7281::Tn7-UAU1</u><br><u>ura3Δ::λimm434 arg4::hisG his1::hisG 19.7281::Tn7-URA3</u> | (Blankenship et al., 2010) |
| SF021  | <u>ura3Δ::λimm434 arg4::hisG his1::hisG 19.3751::Tn7-UAU1</u><br><u>ura3Δ::λimm434 arg4::hisG his1::hisG 19.3751::Tn7-URA3</u> | (Blankenship et al., 2010) |
| JJH54  | <u>ura3Δ::λimm434 arg4::hisG his1::hisG sok1::Tn7-UAU1</u>                                                                     | (Blankenship et al., 2010) |

|       |                                                                                                                              |                            |
|-------|------------------------------------------------------------------------------------------------------------------------------|----------------------------|
|       | <i>ura3Δ::λimm434 arg4::hisG his1::hisG sok1::Tn7-URA3</i>                                                                   |                            |
| JJH74 | <i>ura3Δ::λimm434 arg4::hisG his1::hisG 19.223::Tn7-UAU1</i><br><i>ura3Δ::λimm434 arg4::hisG his1::hisG 19.223::Tn7-URA3</i> | (Blankenship et al., 2010) |
| SF008 | <i>ura3Δ::λimm434 arg4::hisG his1::hisG ire1::Tn7-UAU1</i><br><i>ura3Δ::λimm434 arg4::hisG his1::hisG ire1::Tn7-URA3</i>     | (Blankenship et al., 2010) |
| SF030 | <i>ura3Δ::λimm434 arg4::hisG his1::hisG ckb2::Tn7-UAU1</i><br><i>ura3Δ::λimm434 arg4::hisG his1::hisG ckb2::Tn7-URA3</i>     | (Blankenship et al., 2010) |

## References

- Blankenship, J. R., S. Fanning, J. J. Hamaker & A. P. Mitchell, (2010) An extensive circuitry for cell wall regulation in *Candida albicans*. *PLoS Pathog* **6**: e1000752.
- Bruno, V. M. & A. P. Mitchell, (2005) Regulation of azole drug susceptibility by *Candida albicans* protein kinase CK2. *Mol Microbiol* **56**: 559-573.
- Rauceo, J. M., J. R. Blankenship, S. Fanning, J. J. Hamaker, J. S. Deneault, F. J. Smith, A. Nantel & A. P. Mitchell, (2008) Regulation of the *Candida albicans* cell wall damage response by transcription factor Sko1 and PAS kinase Psk1. *Mol Biol Cell* **19**: 2741-2751.
